# Supplementary material for: Phytochemical Profile and Biological Activities of Different Extracts of Three Parts of Paliurus spina-christi: A Linkage between Structure and Ability
Source: MDPI journal article supplement (doi:10.3390/antiox12020255), 2023-01-23
Supplement: s1 [file s1]

Table S1. Total phenolic and flavonoid content of the tested extracts

| Parts  | Solvents        | TPC (mg GAE/g)           | TFC (mg RE/g)           |
|--------|-----------------|--------------------------|-------------------------|
| Stems  | n-hexane        | 22.36±0.26 <sup>e</sup>  | 0.83±0.07 <sup>e</sup>  |
|        | Ethyl acetate   | 55.19±1.29 <sup>c</sup>  | 7.84±0.26 <sup>c</sup>  |
|        | Dichloromethane | 30.50±0.82 <sup>d</sup>  | 8.56±0.15 <sup>b</sup>  |
|        | Methanol        | 121.78±1.41 <sup>a</sup> | 11.25±0.26 <sup>a</sup> |
|        | Water           | 105.14±0.99 <sup>b</sup> | 5.32±0.08 <sup>d</sup>  |
| Fruits | n-hexane        | 16.86±0.25 <sup>c</sup>  | 0.14±0.03 <sup>e</sup>  |
|        | Ethyl acetate   | 17.36±0.32 <sup>c</sup>  | 0.51±0.03 <sup>c</sup>  |
|        | Dichloromethane | 16.58±0.75 <sup>c</sup>  | 0.34±0.02 <sup>d</sup>  |
|        | Methanol        | 75.91±0.58 <sup>a</sup>  | 17.55±0.09 <sup>a</sup> |
|        | Water           | 68.97±0.36 <sup>b</sup>  | 8.84±0.39 <sup>b</sup>  |
| Leaves | n-hexane        | 23.21±0.28 <sup>cd</sup> | 8.43±0.03 <sup>e</sup>  |
|        | Ethyl acetate   | 25.72±0.10 <sup>c</sup>  | 11.68±0.47 <sup>d</sup> |
|        | Dichloromethane | 21.77±0.04 <sup>d</sup>  | 21.56±0.14 <sup>c</sup> |
|        | Methanol        | 94.64±2.12 <sup>a</sup>  | 75.36±0.92 <sup>a</sup> |
|        | Water           | 62.55±0.28 <sup>b</sup>  | 42.18±0.26 <sup>b</sup> |

Values are reported as mean ±SD of three parallel measurements. TPC: Total Phenolic Content; TFC: Total Flavonoid Content; GAE: Gallic acid equivalent; RE: Rutin equivalent. Different letters indicate significant differences in the extracts from same parts (p<0.05).

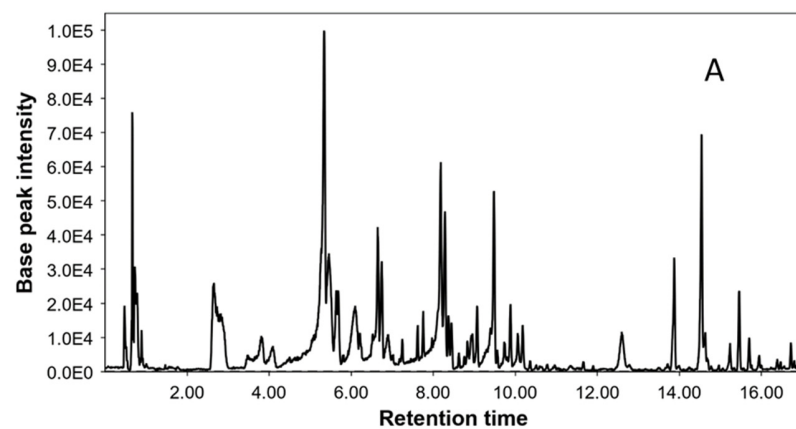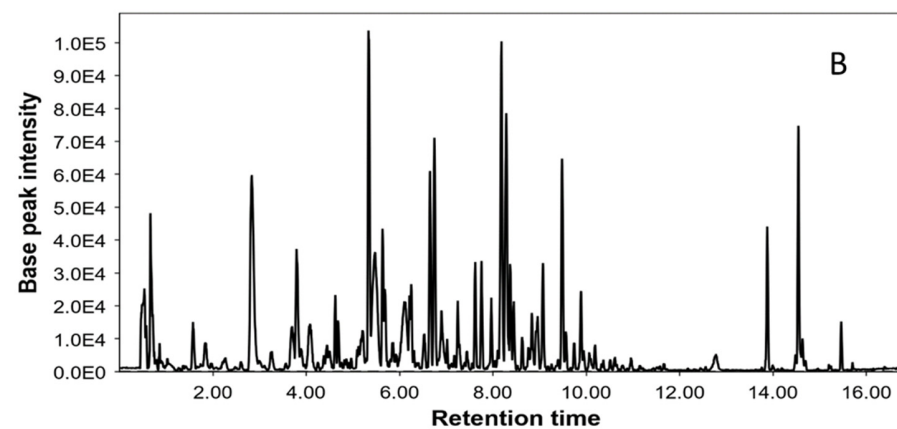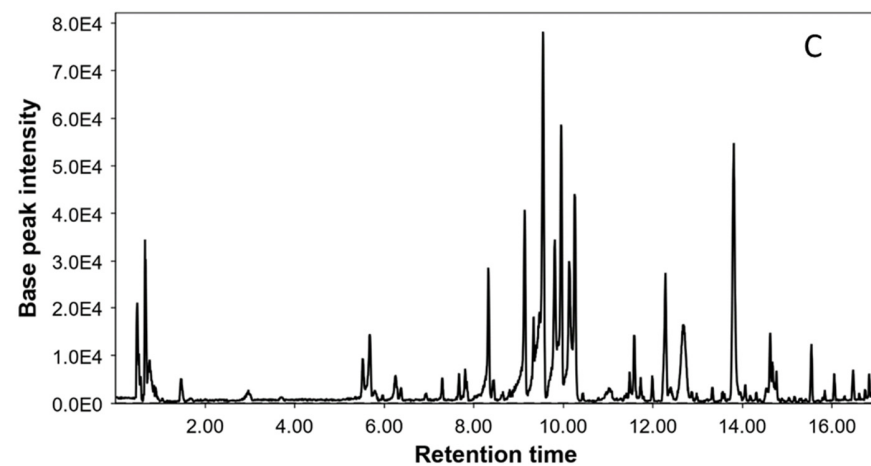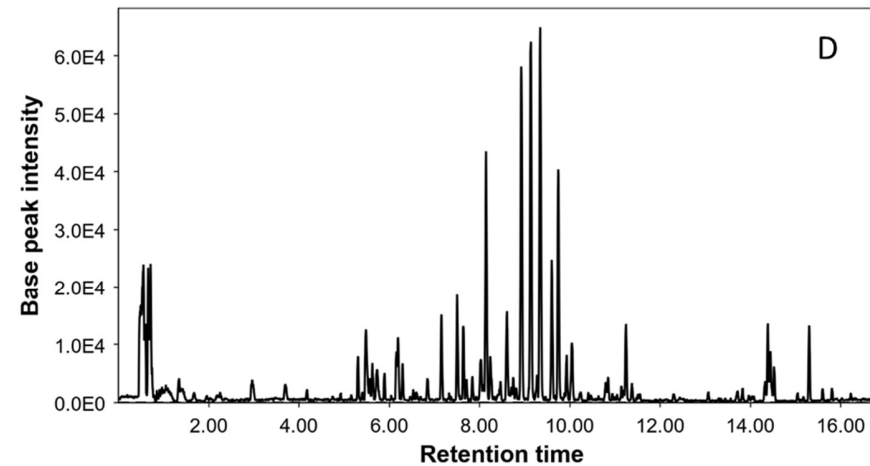

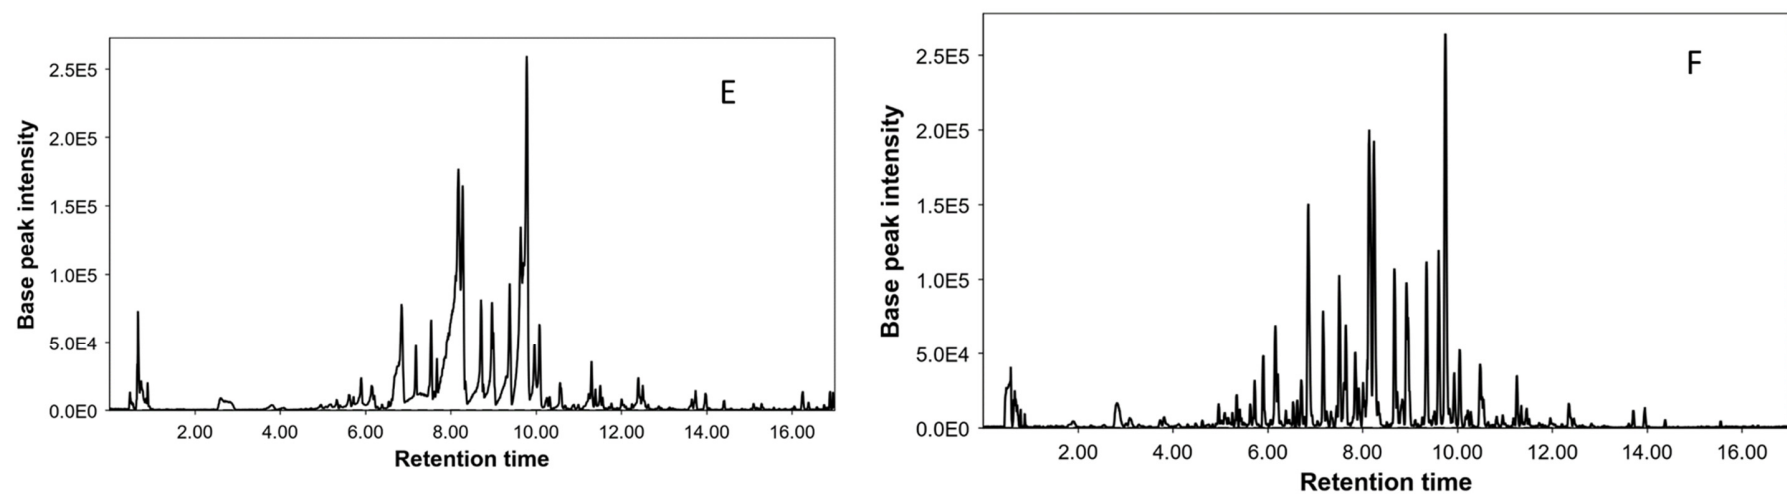

Figure S1. Base peak chromatogram of (A) methanol, (B) water steam extracts, (C) methanol, (D) water fruit extracts, (E) methanol and (F) water leaf extracts from *Paliurus*.
